# Supplementary material
Source: publisher figshare collection journal article supplement (https://acs.figshare.com/ndownloader/files/16947737)
Supplement: Supplementary file 1 [file 16947737]

## **Supporting Information**

### **Respirable Particulate Constituents and Risk of Cause-specific Mortality in the Hong Kong Population**

Shengzhi Sun<sup>1,2</sup>, Wangnan Cao<sup>3</sup>, Vivian C. Pun<sup>4</sup>, Hong Qiu<sup>1</sup>, Yang Ge<sup>5</sup>, and Linwei Tian<sup>1\*</sup>

<sup>1</sup>School of Public Health, The University of Hong Kong, Hong Kong SAR, China

<sup>2</sup>Department of Epidemiology, Brown University School of Public Health, Providence, RI 02912, USA

<sup>3</sup>Center for Evidence Synthesis in Health, School of Public Health, Brown University, Providence, RI 02912, USA

<sup>4</sup>Jockey Club School of Public Health and Primary Care, The Chinese University of Hong Kong, Hong Kong SAR, China

<sup>5</sup>School of Public Health, Department of Epidemiology and Biostatistics, University of Georgia 30606, USA

\*Corresponding author, [linweit@hku.hk](mailto:linweit@hku.hk)

### **Table of Contents**

**Figure S1.** Time-series plots of PM<sub>10</sub> mass and its constituents.

**Figure S2.** Excess risk (%) of five categories of deaths associated with an interquartile range increase in respirable particulate matter total mass by lag days in Hong Kong, 2001-2010.

**Figure S3.** Cumulative excess risk (%) of cause-specific mortality associated with an interquartile range increase in respirable particulate constituents over lag<sub>0-7</sub> days among people aged less than 65 years old in Hong Kong, 2001-2010.

**Figure S4.** Cumulative excess risk (%) of cause-specific mortality associated with an interquartile range increase in respirable particulate constituents over lag<sub>0-7</sub> days among people aged 65 years and older in Hong Kong, 2001-2010.

**Figure S5.** Cumulative excess risk (%) of causes-specific mortality associated with an interquartile range increase in respirable particulate constituents over lag<sub>0-7</sub> days with missing data replaced by previous day measurement values in Hong Kong, 2001-2010.

**Figure S6.** Cumulative excess risk (%) of causes-specific mortality associated with an interquartile range increase in respirable particulate constituents over lag<sub>0-7</sub> days using 7 degrees of freedom per year to control for seasonal and long-term trend in the regression models in Hong Kong, 2001-2010.

**Figure S7.** Cumulative excess risk (%) of causes-specific mortality associated with an interquartile range increase in respirable particulate constituents over lag<sub>0-7</sub> days using 9 degrees of freedom per year to control for seasonal and long-term trend in the regression models in Hong Kong, 2001-2010.

**Figure S1.** Time-series plots of PM<sub>10</sub> mass and its constituents.

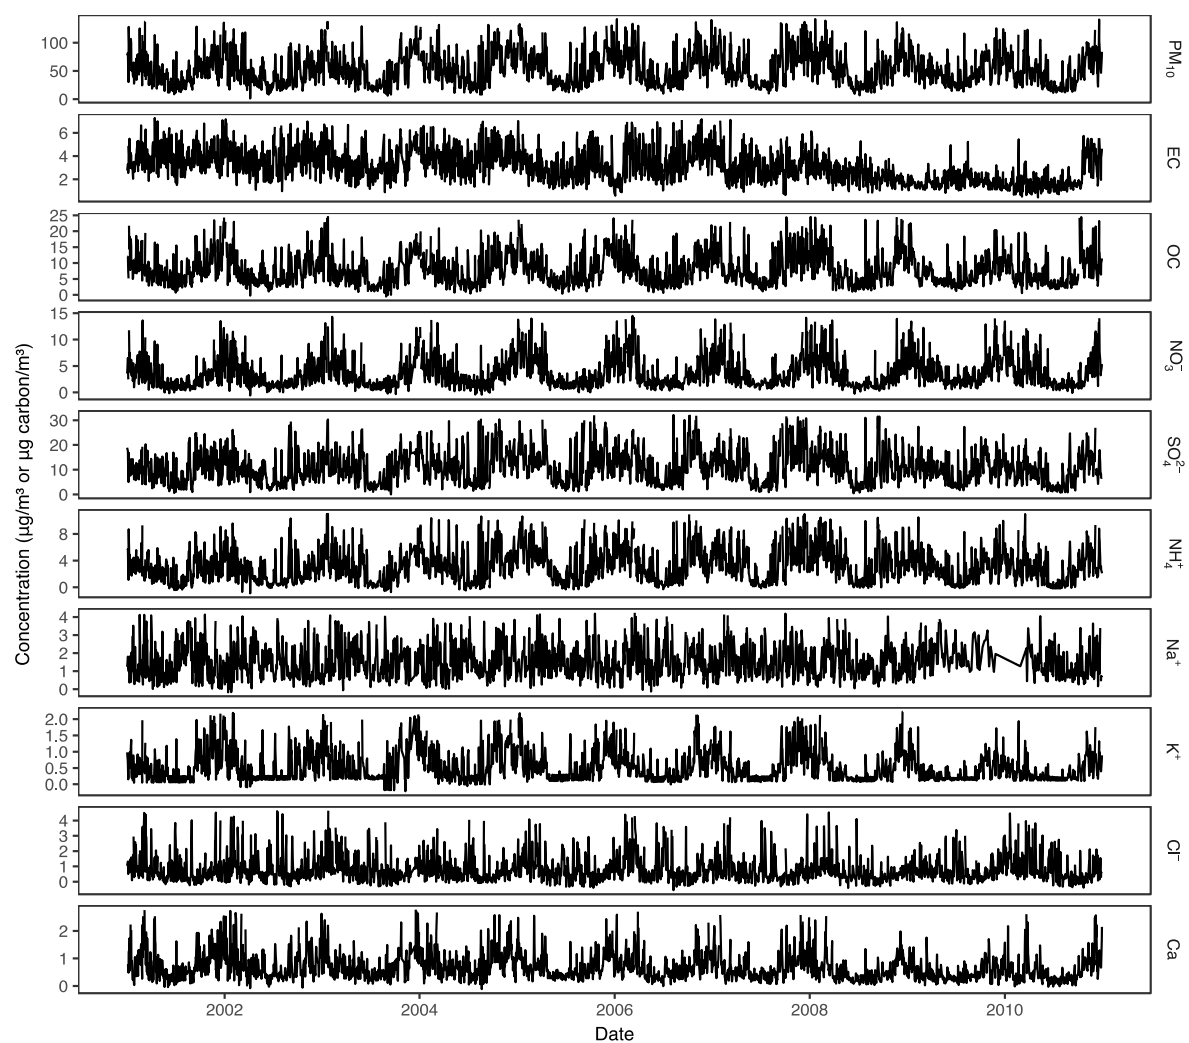

Abbreviations: IQR=interquartile range; EC=elemental carbon; OC=organic carbon; NO<sub>3</sub><sup>-</sup>=nitrate; SO<sub>4</sub><sup>2-</sup>= sulfate; NH<sub>4</sub><sup>+</sup>=ammonium; Na<sup>+</sup>=sodium ion; K<sup>+</sup>=potassium ion; Cl<sup>-</sup>=chloride ion.

**Figure S2.** Excess risk (%) of five broad causes of deaths associated with an interquartile range increase in respirable particulate matter total mass by lag days in Hong Kong, 2001-2010.

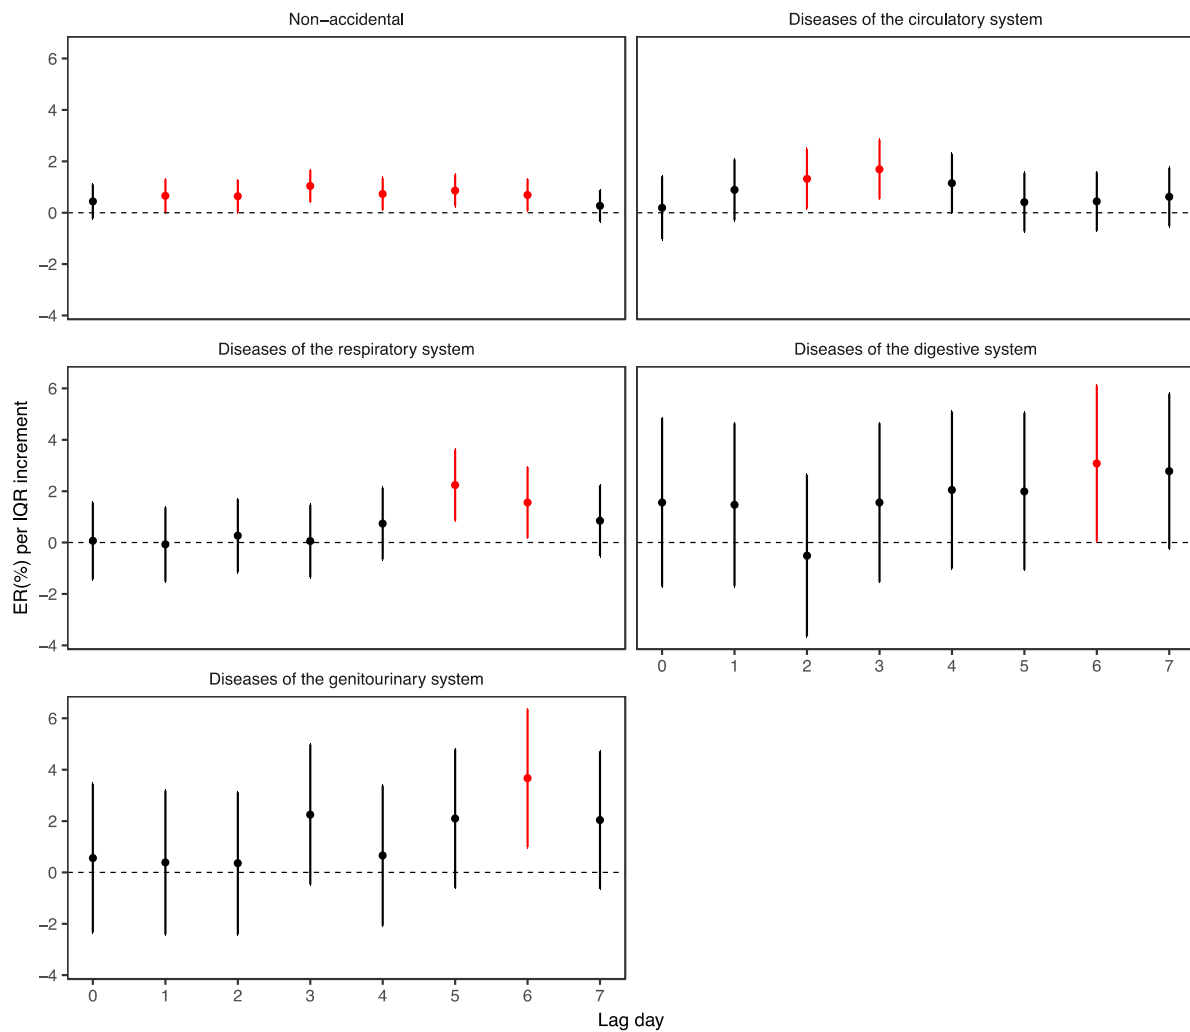

Models were adjusted for ambient temperature, relative humidity, long-term trend and seasonality, days of the week, public holidays, and influenza epidemics.

**Figure S3.** Cumulative excess risk (%) of cause-specific mortality associated with an interquartile range increase in respirable particulate constituents over lag<sub>0-7</sub> days among people aged less than 65 years old in Hong Kong, 2001-2010.

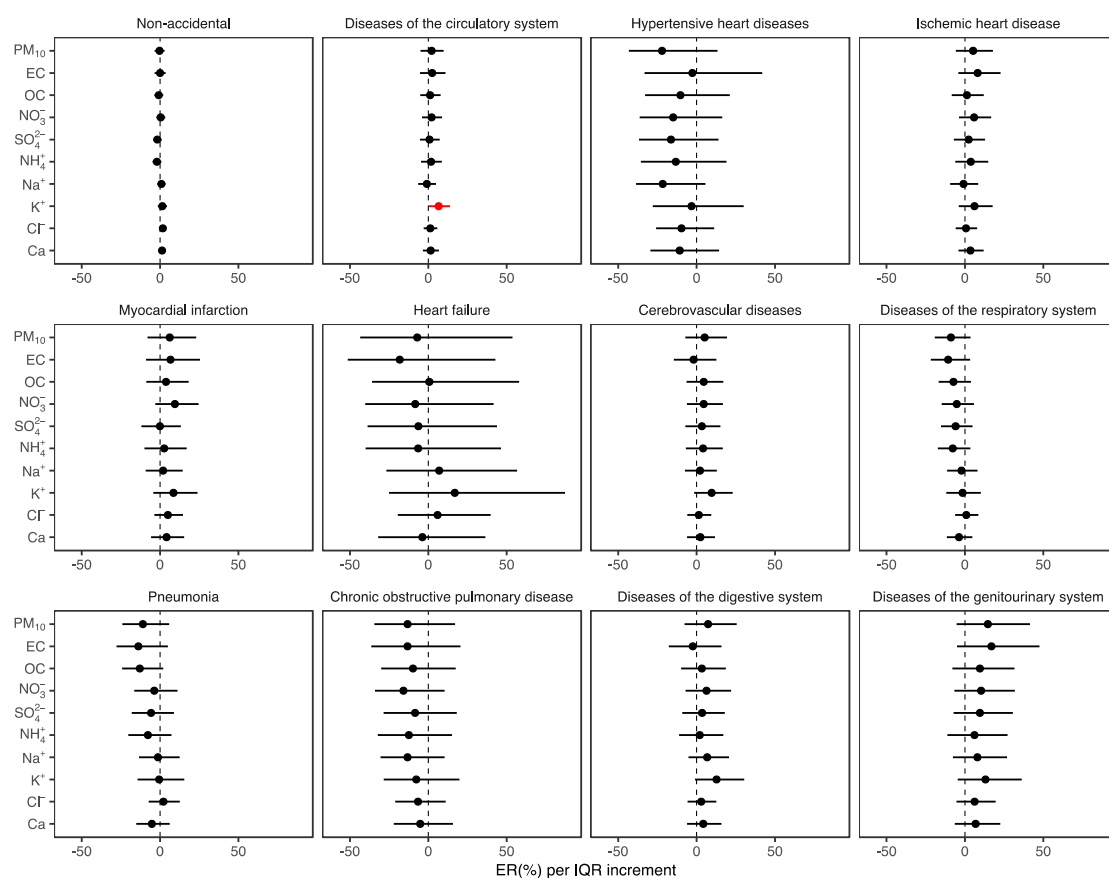

Abbreviations: PM<sub>10</sub>= respirable particulate matter; IQR=interquartile range; EC=elemental carbon; OC=organic carbon; NO<sub>3</sub>= nitrate; SO<sub>4</sub><sup>2-</sup>= sulfate; NH<sub>4</sub><sup>+</sup>=ammonium; Na<sup>+</sup>=sodium ion; K<sup>+</sup>=potassium ion; Cl<sup>-</sup>=chloride ion.

Models were adjusted for ambient temperature, relative humidity, long-term trend and seasonality, days of the week, public holidays, and influenza epidemics.

**Figure S4.** Cumulative excess risk (%) of cause-specific mortality associated with an interquartile range increase in respirable particulate constituents over lag<sub>0-7</sub> days among people aged 65 years and older in Hong Kong, 2001-2010.

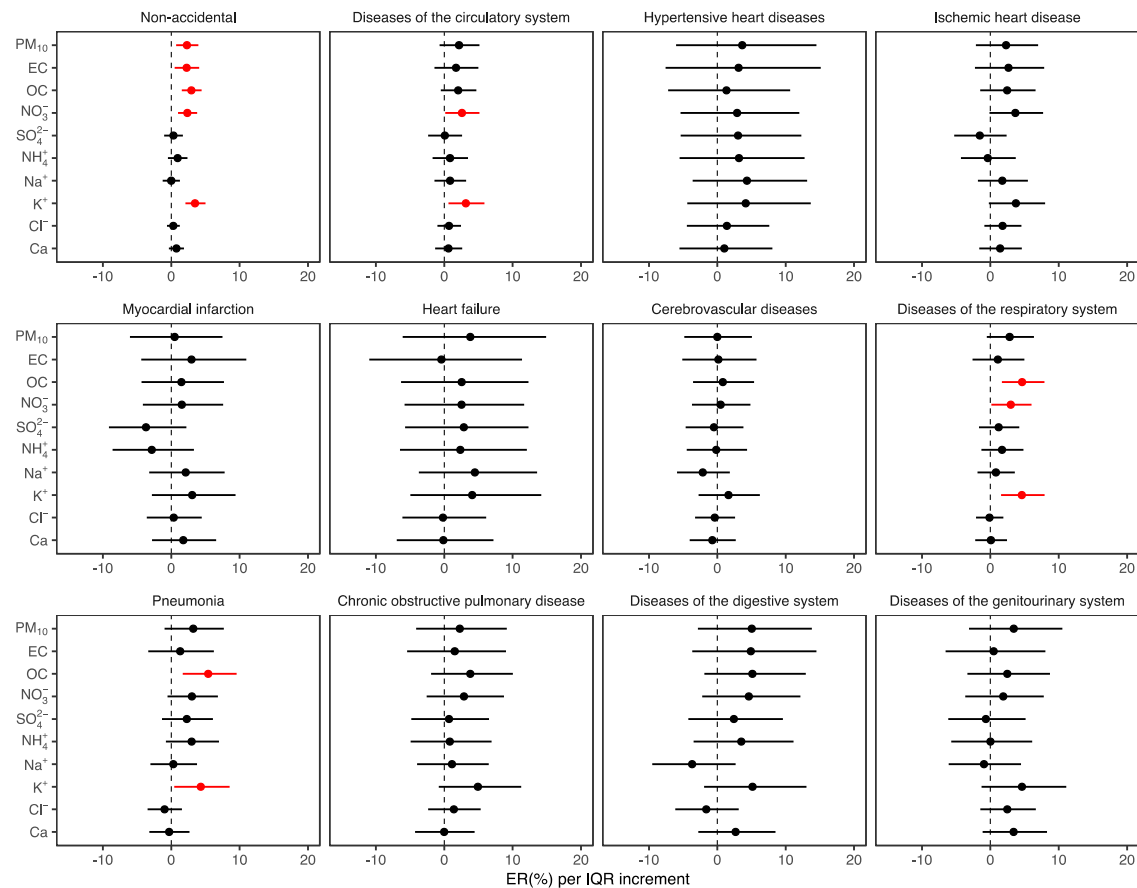

Abbreviations: PM<sub>10</sub>= respirable particulate matter; IQR=interquartile range; EC=elemental carbon; OC=organic carbon; NO<sub>3</sub><sup>-</sup>= nitrate; SO<sub>4</sub><sup>2-</sup>= sulfate; NH<sub>4</sub><sup>+</sup>=ammonium; Na<sup>+</sup>=sodium ion; K<sup>+</sup>=potassium ion; Cl<sup>-</sup>=chloride ion.

Models were adjusted for ambient temperature, relative humidity, long-term trend and seasonality, days of the week, public holidays, and influenza epidemics.

**Figure S5.** Cumulative excess risk (%) of causes-specific mortality associated with an interquartile range increase in respirable particulate constituents over lag<sub>0-7</sub> days with missing data replaced by previous day measurement values in Hong Kong, 2001-2010.

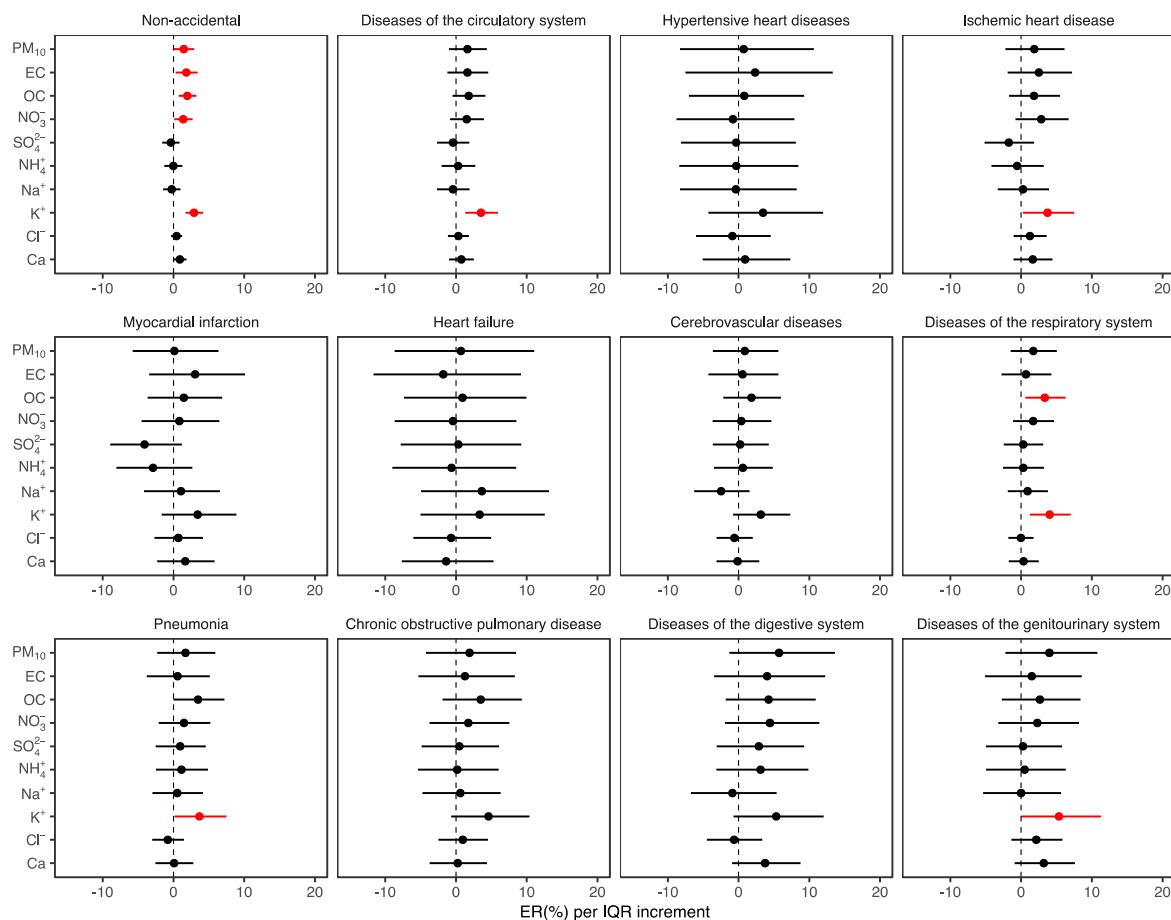

Abbreviations: PM<sub>10</sub>= respirable particulate matter; IQR=interquartile range; EC=elemental carbon; OC=organic carbon; NO<sub>3</sub><sup>-</sup>= nitrate; SO<sub>4</sub><sup>2-</sup>= sulfate; NH<sub>4</sub><sup>+</sup>=ammonium; Na<sup>+</sup>=sodium ion; K<sup>+</sup>=potassium ion; Cl<sup>-</sup>=chloride ion.

Models were adjusted for ambient temperature, relative humidity, long-term trend and seasonality, days of the week, public holidays, and influenza epidemics.

**Figure S6.** Cumulative excess risk (%) of causes-specific mortality associated with an interquartile range increase in respirable particulate constituents over lag<sub>0-7</sub> days using 7 degrees of freedom per year to control for seasonal and long-term trend in the regression models in Hong Kong, 2001-2010.

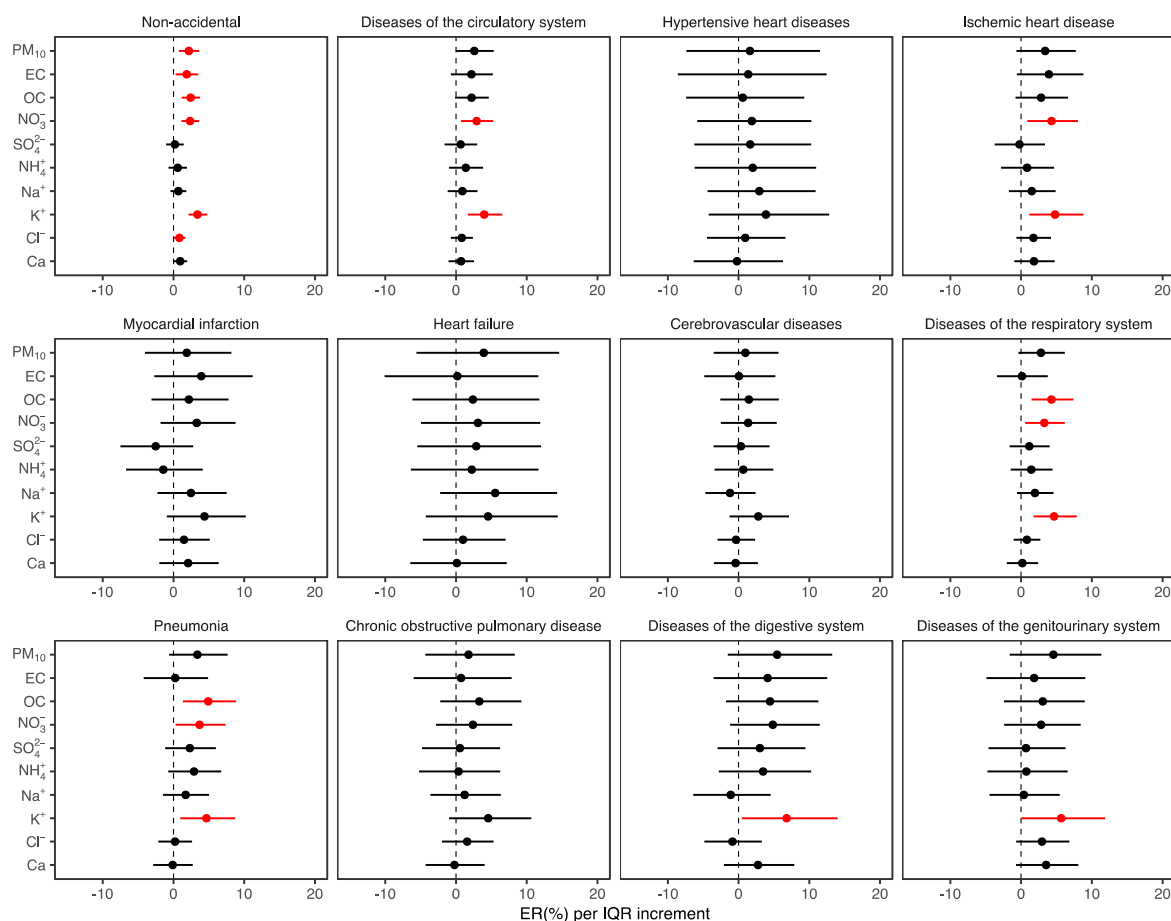

Abbreviations: PM<sub>10</sub>= respirable particulate matter; IQR=interquartile range; EC=elemental carbon; OC=organic carbon; NO<sub>3</sub><sup>-</sup>= nitrate; SO<sub>4</sub><sup>2-</sup>= sulfate; NH<sub>4</sub><sup>+</sup>=ammonium; Na<sup>+</sup>=sodium ion; K<sup>+</sup>=potassium ion; Cl<sup>-</sup>=chloride ion.

Models were adjusted for ambient temperature, relative humidity, long-term trend and seasonality, days of the week, public holidays, and influenza epidemics.

**Figure S7.** Cumulative excess risk (%) of causes-specific mortality associated with an interquartile range increase in respirable particulate constituents over lag<sub>0-7</sub> days using 9 degrees of freedom per year to control for seasonal and long-term trend in the regression models in Hong Kong, 2001-2010.

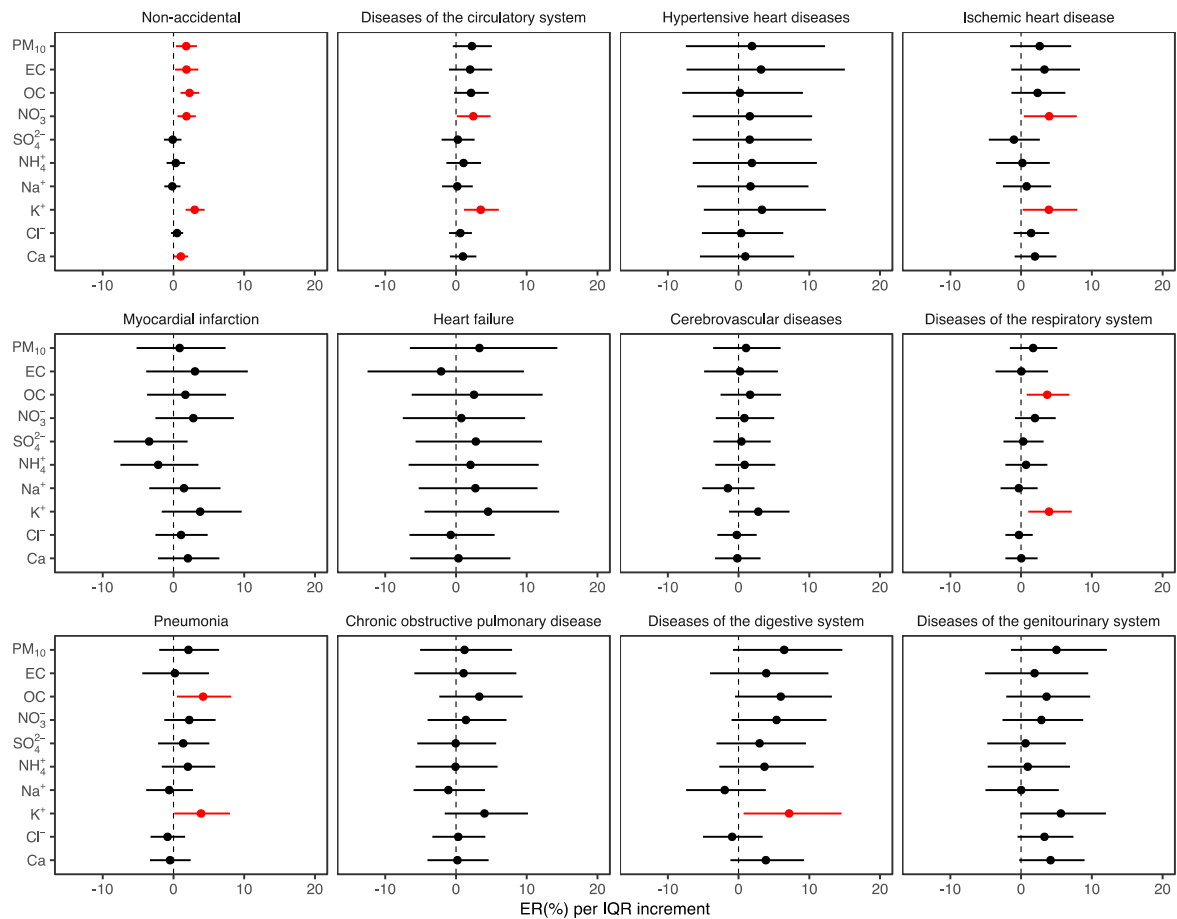

Abbreviations: PM<sub>10</sub>= respirable particulate matter; IQR=interquartile range; EC=elemental carbon; OC=organic carbon; NO<sub>3</sub><sup>-</sup>= nitrate; SO<sub>4</sub><sup>2-</sup>= sulfate; NH<sub>4</sub><sup>+</sup>=ammonium; Na<sup>+</sup>=sodium ion; K<sup>+</sup>=potassium ion; Cl<sup>-</sup>=chloride ion.

Models were adjusted for ambient temperature, relative humidity, long-term trend and seasonality, days of the week, public holidays, and influenza epidemics.
